# Supplementary figures and images for: Xenofree generation of oral keratinocytes from induced pluripotent stem cells derived from adult human fibroblasts for oral mucosal regeneration
Source: Research Square preprint supplement (doi:10.21203/rs.3.rs-7842122/v1), 2025-11-26

Pancytokeratin full blot

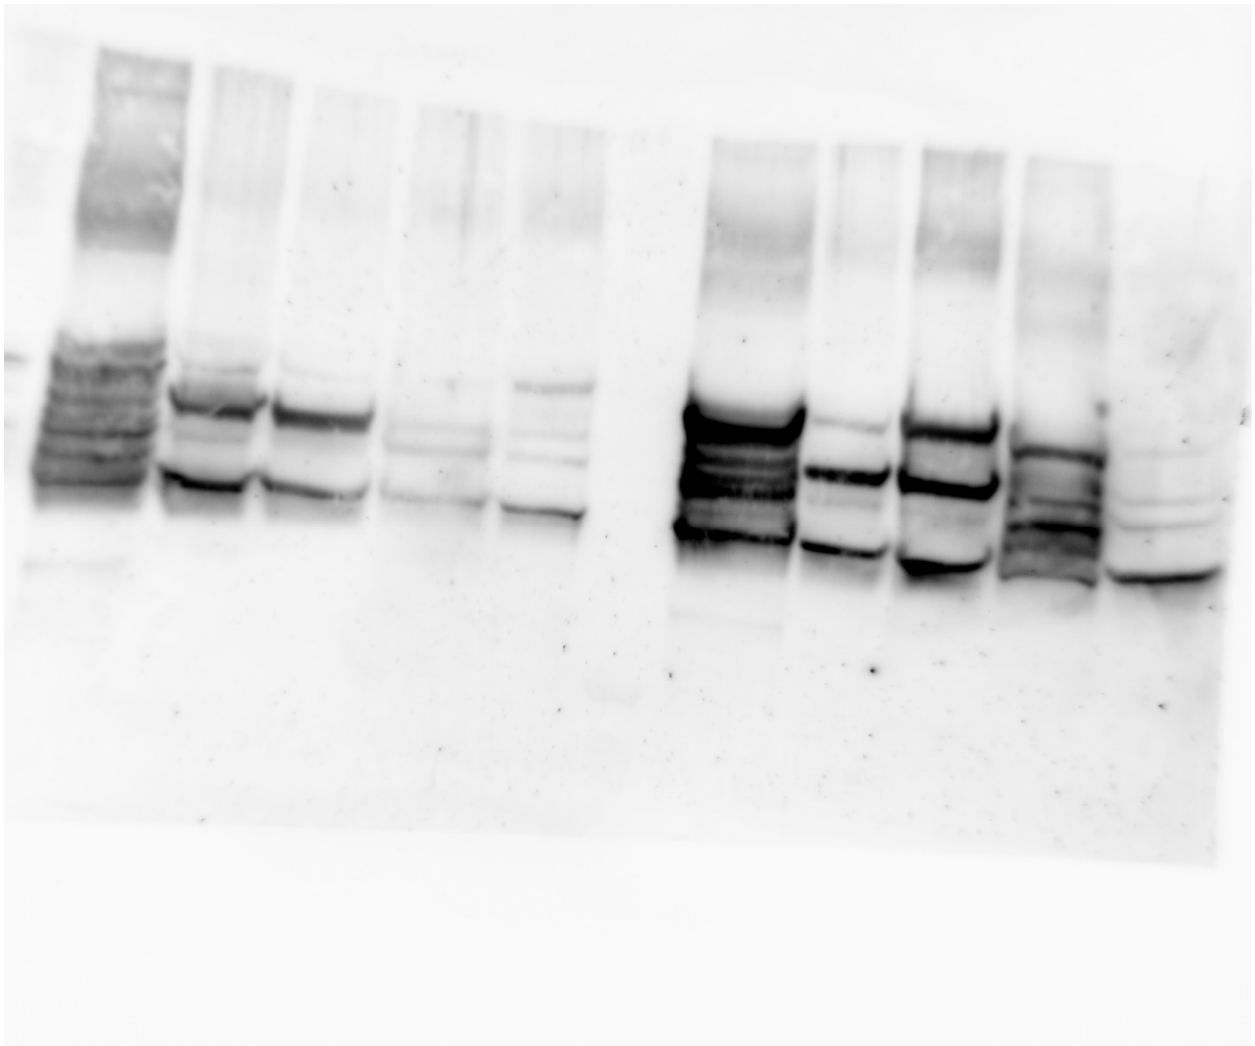

B-actin full blot

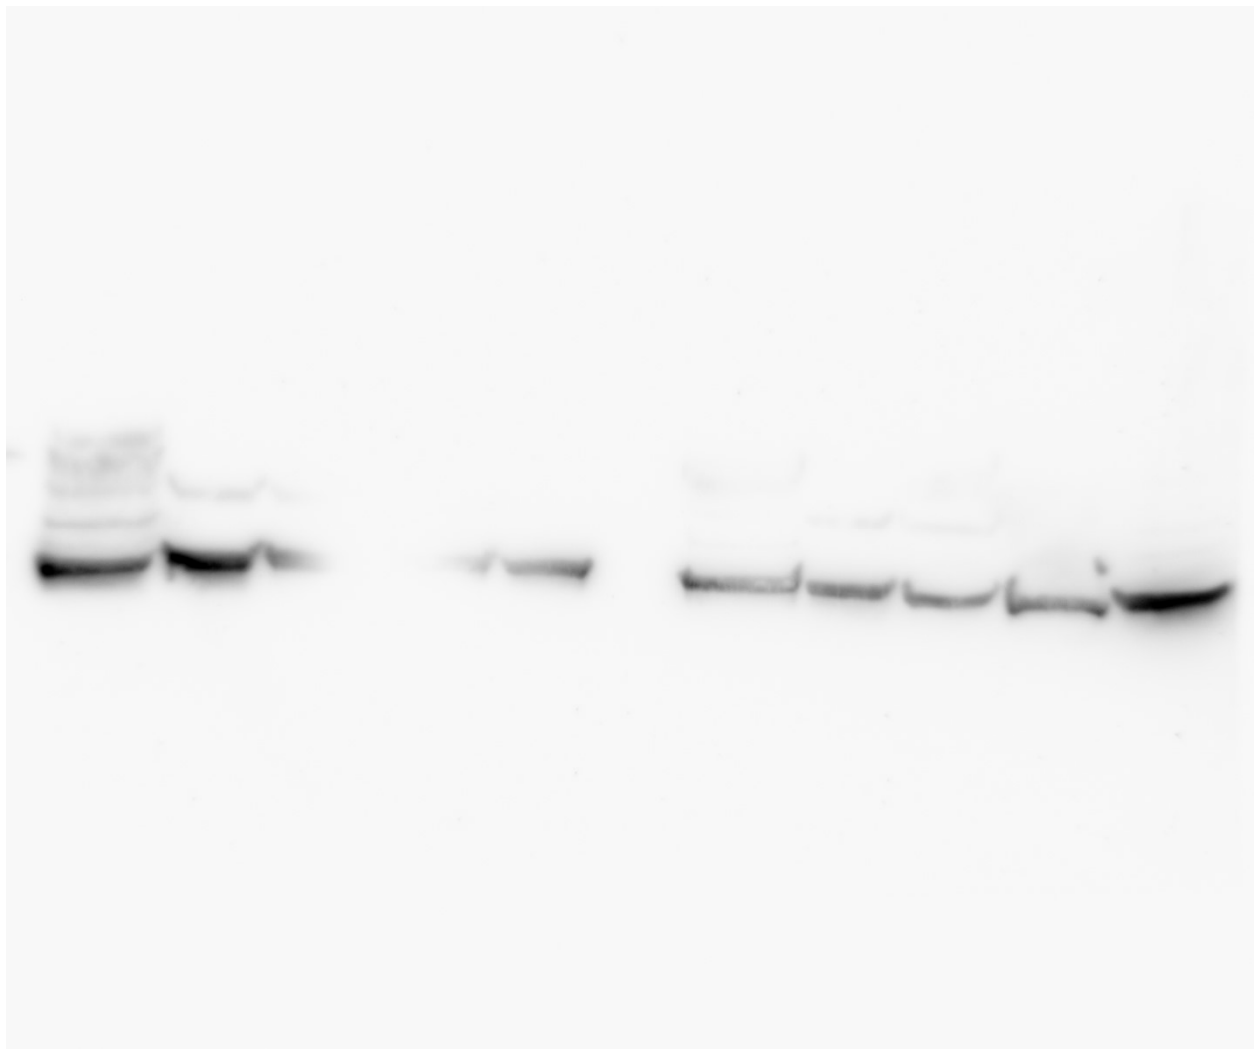

Supplement: Supplementary file 1 [file 995d648534ea26a860ca677a.pdf]
